# Supplementary material for: Effects of Cu ratios on the C1–C6 growth mechanism on copper–nickel bimetallic surfaces
Source: Royal Society of Chemistry journal article supplement (doi:10.1039/d3cp01898a), 2023-01-01
Supplement: d3cp01898a1.pdf [file d3cp01898a1.pdf]

## Supplementary Materials:

### Effects of Cu ratio on the C<sub>1</sub>-C<sub>6</sub> growth mechanism on copper-nickel bimetallic surface

Cunxin Zhang<sup>a</sup>, Juntian Niu<sup>a\*</sup>, Zeyu Guo<sup>a</sup>, Haiyu Liu<sup>a</sup>, Yan Jin<sup>a</sup>, Jingyu Ran<sup>b</sup>

<sup>a</sup> College of Electrical and Power Engineering, Taiyuan University of Technology, Taiyuan 030024, Shanxi, China

<sup>b</sup> Key Laboratory of Low-grade Energy Utilization Technologies and Systems (Chongqing University), Ministry of Education of China, Chongqing University, Chongqing 400044, China

\*Corresponding authors: Juntian Niu

E-mail: [juntianniu@163.com](mailto:juntianniu@163.com)

Table S1 Adsorption energy E<sub>ads</sub>(eV) and Muliken Charge of C<sub>n</sub> on the surfaces

| n | Configuration     | Ni                      |                     | Ni <sub>2</sub> Cu <sub>1</sub> |                     | Ni <sub>1</sub> Cu <sub>2</sub> |                     | Cu                      |                     |
|---|-------------------|-------------------------|---------------------|---------------------------------|---------------------|---------------------------------|---------------------|-------------------------|---------------------|
|   |                   | E <sub>ads</sub><br>/eV | Muliken<br>charge/e | E <sub>ads</sub><br>/eV         | Muliken<br>charge/e | E <sub>ads</sub><br>/eV         | Muliken<br>charge/e | E <sub>ads</sub><br>/eV | Muliken<br>charge/e |
| 1 | -                 | -2.745                  | -0.448              | -2.554                          | -0.405              | -2.388                          | -0.373              | -2.225                  | -0.343              |
| 2 | -                 | -3.248                  | -0.538              | -3.047                          | -0.481              | -2.782                          | -0.394              | -2.625                  | -0.354              |
| 3 | -                 | -3.364                  | -0.638              | -3.101                          | -0.551              | -2.892                          | -0.493              | -2.643                  | -0.423              |
| 4 | -                 | -3.461                  | -0.711              | -3.163                          | -0.610              | -2.912                          | -0.544              | -2.662                  | -0.477              |
|   | chain             | -3.808                  | -0.760              | -3.512                          | -0.619              | -3.275                          | -0.610              | -2.986                  | -0.529              |
| 5 | ring <sup>a</sup> | -3.958                  | -0.882              | -3.583                          | -0.773              | -3.276                          | -0.675              | -                       | -                   |
|   | ring <sup>b</sup> | -                       | -                   | -3.593                          | -0.780              | 3.298                           | -0.680              | -3.007                  | -0.594              |
|   | chain             | -4.075                  | -0.763              | -3.772                          | -0.662              | -3.441                          | -0.587              | -3.174                  | -0.511              |
| 6 | ring <sup>a</sup> | -3.861                  | -0.851              | -3.443                          | -0.759              | -2.722                          | -0.640              | -                       | -                   |
|   | ring <sup>b</sup> | -                       | -                   | -3.535                          | -0.755              | -3.193                          | -0.678              | -2.565                  | -0.591              |

a: The center of the carbon ring is placed above the Ni atom

b: The center of the carbon ring is placed above the Cu atom

Table S2 Shortest distance between chains of C<sub>n</sub> and surface L<sub>min</sub>(Å)

| L <sub>min</sub> /Å             | C <sub>1</sub> | C <sub>2</sub> | C <sub>3</sub> | C <sub>4</sub> | C <sub>5</sub> | C <sub>6</sub> |
|---------------------------------|----------------|----------------|----------------|----------------|----------------|----------------|
| Ni                              | 1.107          | 1.301          | 1.395          | 1.376          | 1.375          | 1.362          |
| Ni <sub>2</sub> Cu <sub>1</sub> | 1.128          | 1.328          | 1.422          | 1.405          | 1.405          | 1.391          |

|                                 |       |       |       |       |       |       |
|---------------------------------|-------|-------|-------|-------|-------|-------|
| Ni <sub>1</sub> Cu <sub>2</sub> | 1.144 | 1.356 | 1.455 | 1.413 | 1.403 | 1.397 |
| Cu                              | 1.159 | 1.377 | 1.466 | 1.432 | 1.442 | 1.416 |

---
